# Supplementary material
Source: PubMed Central journal article supplement (PMC4724309)
Supplement: NIHMS710772-supplement-Supp_TableS1-S2.pdf [file NIHMS710772-supplement-Supp_TableS1-S2.pdf]

## INVESTIGATORS AND AFFILIATIONS

### *Parkinson's Progression Marker Initiative (PPMI)*

#### **Steering Committee:**

Kenneth Marek, MD<sup>1</sup> (Principal Investigator); Danna Jennings, MD<sup>1</sup> (Site Investigator, Olfactory Core, PI); Shirley Lasch, MBA<sup>1</sup>; Caroline Tanner, MD, PhD<sup>9</sup> (Site Investigator); Tanya Simuni, MD<sup>3</sup> (Site Investigator); Christopher Coffey, PhD<sup>4</sup> (Statistics Core, PI); Karl Kieburtz, MD, MPH<sup>5</sup> (Clinical Core, PI); Renee Wilson, MA<sup>5</sup>; Werner Poewe, MD<sup>7</sup> (Site Investigator); Brit Mollenhauer, MD<sup>8</sup> (Site Investigator); Douglas Galasko, MD<sup>28</sup>; Tatiana Foroud, PhD<sup>16</sup> (Genetics Coordination Core, BioRepository PI); Todd Sherer, PhD<sup>6</sup>; Sohini Chowdhury<sup>6</sup>; Mark Frasier, PhD<sup>6</sup>; Catherine Kopil, PhD<sup>6</sup>; Vanessa Arnedo<sup>6</sup>

#### **Study Cores:**

*Clinical Coordination Core:* Cynthia Casaceli, MBA<sup>5</sup>

*Imaging Core:* John Seibyl, MD<sup>1</sup>; Susan Mendick, MPH<sup>1</sup>; Norbert Schuff, PhD<sup>9</sup>

*Statistics Core:* Christopher Coffey, PhD<sup>4</sup>; Chelsea Caspell<sup>4</sup>; Liz Uribe<sup>4</sup>; Eric Foster<sup>4</sup>; Katherine Gloer PhD<sup>4</sup>; Jon Yankey MS<sup>4</sup>

*Bioinformatics Core:* Arthur Toga, PhD<sup>10</sup> (Principal Investigator), Karen Crawford, MLIS<sup>10</sup>

*BioRepository:* , Danielle Elise Smith<sup>16</sup>; Paola Casalin<sup>12</sup>; Giulia Malferrari<sup>12</sup>

*Bioanalytics Core:* John Trojanowski, MD, PhD<sup>13</sup> (Principal Investigator); Les Shaw, PhD<sup>13</sup> (Co-Principal Investigator)

*Genetics Core:* Andrew Singleton, PhD<sup>14</sup> (Principal Investigator)

*Genetics Coordination Core:* Cheryl Halter<sup>16</sup>

#### **Site Investigators:**

David Russell, MD, PhD<sup>1</sup> Site; Stewart Factor, DO<sup>17</sup>; Penelope Hogarth, MD<sup>18</sup>; David Standaert, MD, PhD<sup>19</sup>; Robert Hauser, MD, MBA<sup>20</sup>; Joseph Jankovic, MD<sup>21</sup>; Matthew Stern, MD<sup>13</sup>; Lama Chahine, MD<sup>13</sup>; Shu-Ching HU, MD PhD<sup>22</sup>; Samuel Frank, MD<sup>23</sup>; Claudia Trenkwalder, MD<sup>8</sup>; Wolfgang Oertel MD<sup>35</sup>; Irene Richard, MD<sup>24</sup>; Klaus Seppi, MD<sup>7</sup>; Eva Reiter, MD<sup>7</sup>; Holly Shill, MD<sup>25</sup>; Hubert Fernandez, MD<sup>26</sup>; Anwar Ahmed, MD<sup>26</sup>; Daniela Berg, MD<sup>27</sup>; Isabel Wurster MD<sup>27</sup>; Zoltan Mari, MD<sup>29</sup>; David Brooks, MD<sup>30</sup>; Nicola Pavese, MD<sup>30</sup>; Paolo Barone, MD, PhD<sup>31</sup>; Stuart Isaacson, MD<sup>32</sup>; Alberto Espay, MD, MSc<sup>33</sup>; Dominic Rowe, MD, PhD<sup>34</sup>; Melanie Brandabur MD<sup>2</sup>; James Tetrad MD<sup>2</sup>; Grace Liang MD<sup>10</sup>; Karen Marder<sup>36</sup>; Jean-Christophe Corvol<sup>37</sup>; Jose Felix Martí Masso<sup>38</sup>; Eduardo Tolosa<sup>39</sup>; Jan O. Aasly<sup>40</sup>; Nir Giladi<sup>41</sup>; Leonidas Stefanis<sup>42</sup>;

#### **Coordinators:**

Laura Leary<sup>1</sup>; Cheryl Riordan<sup>1</sup>; Linda Rees, MPH<sup>1</sup>; Barbara Sommerfeld, RN, MSN<sup>17</sup>; Cathy Wood-Siverio, MS<sup>17</sup>; Alicia Portillo<sup>18</sup>; Art Lenahan<sup>18</sup>; Karen Williams<sup>3</sup>; Stephanie Guthrie, MSN<sup>19</sup>; Ashlee Rawlins<sup>19</sup>; Sherry Hartan<sup>20</sup>; Christine Hunter, RN<sup>21</sup>; Baochan Tran<sup>13</sup>; Abigail Darin<sup>13</sup>; Carly Linder<sup>13</sup>; Gretchen Todd<sup>22</sup>; Cathi-Ann Thomas, RN, MS<sup>23</sup>; Raymond James, RN<sup>23</sup>; Cheryl Deeley, MSN<sup>24</sup>; Courtney Bishop BS<sup>24</sup>; Fabienne Sprenger, MD<sup>7</sup>; Diana Willeke<sup>8</sup>; Sanja Obradov<sup>25</sup>; Jennifer Mule<sup>26</sup>; Nancy Monahan<sup>26</sup>; Katharina Gauss<sup>27</sup>; Kathleen Comyns<sup>9</sup>; Deborah Fontaine, BSN, MS, RN, GNP, MS<sup>28</sup>; Christina Gigliotti<sup>28</sup>; Arita McCoy<sup>29</sup>; Becky Dunlop<sup>29</sup>; Bina Shah, BSc<sup>30</sup>; Susan Ainscough<sup>31</sup>; Angela James<sup>32</sup>; Rebecca Silverstein<sup>32</sup>; Kristy Espay<sup>33</sup>; Madelaine Ranola<sup>34</sup>; Helen M. Santana<sup>36</sup>; Nelly Ngono<sup>37</sup>; Elisabet Rezola<sup>38</sup>; Delores Vilas Rolan<sup>39</sup>; Bjorg Waro<sup>40</sup>; Anat Mirlman<sup>41</sup>; Maria Stamelou<sup>42</sup>;

#### **ISAB (Industry Scientific Advisory Board):**

Thomas Comery, PhD<sup>43</sup>; Spyros Papapetropoulos, MD, PhD<sup>43</sup>; Bernard Ravina, MD, MSCE<sup>44</sup>; Igor D. Grachev, MD, PhD<sup>45</sup>; Jordan S. Dubow, MD<sup>46</sup>; Michael Ahljianian, PhD<sup>47</sup>; Holly Soares, PhD<sup>47</sup>; Suzanne Ostrowizki, MD, PhD<sup>48</sup>; Paulo Fontoura, MD, PhD<sup>48</sup>; Alison Chalker, PhD<sup>49</sup>; David L. Hewitt, MD<sup>49</sup>; Marcel van der Brug, PhD<sup>50</sup>; Alastair D. Reith, PhD<sup>51</sup>; Peggy Taylor, ScD<sup>52</sup>; Jan Egebjerg, PhD<sup>53</sup>; Mark Minton, MD<sup>53</sup>; Andrew Siderowf, MD, MSCE<sup>54</sup>; Pierandrea Muglia, PhD<sup>55</sup>; Robert Umek, PhD<sup>56</sup>; Ana Catafau, MD, PhD<sup>57</sup>

1 Institute for Neurodegenerative Disorders, New Haven, CT

2 The Parkinson's Institute, Sunnyvale, CA

3 Northwestern University, Chicago, IL

4 University of Iowa, Iowa City, IA

5 Clinical Trials Coordination Center, University of Rochester, Rochester, NY  
6 The Michael J. Fox Foundation for Parkinson's Research, New York, NY  
7 Innsbruck Medical University, Innsbruck, Austria  
8 Paracelsus-Elena Klinik, Kassel, Germany  
9 University of California, San Francisco, CA  
10 Laboratory of Neuroimaging (LONI), University of Southern California  
11 Coriell Institute for Medical Research, Camden, NJ  
12 BioRep, Milan, Italy  
13 University of Pennsylvania, Philadelphia, PA  
14 National Institute on Aging, NIH, Bethesda, MD  
16 Indiana University, Indianapolis, IN  
17 Emory University of Medicine, Atlanta, GA  
18 Oregon Health and Science University, Portland, OR  
19 University of Alabama at Birmingham, Birmingham, AL  
20 University of South Florida, Tampa, FL  
21 Baylor College of Medicine, Houston, TX  
22 University of Washington, Seattle, WA  
23 Boston University, Boston, MA  
24 University of Rochester, Rochester, NY  
25 Banner Research Institute, Sun City, AZ  
26 Cleveland Clinic, Cleveland, OH  
27 University of Tuebingen, Tuebingen, Germany  
28 University of California, San Diego, CA  
29 Johns Hopkins University, Baltimore, MD  
30 Imperial College of London, London, UK  
31 University of Salerno, Salerno, Italy  
32 Parkinson's Disease and Movement Disorders Center, Boca Raton, FL  
33 University of Cincinnati, Cincinnati, OH  
34 Macquarie University, Sydney Australia  
35 Philipps University Marburg, Germany  
36 Columbia Medical, New York, NY  
37 Pitié-Salpêtrière Hospital, Paris France  
38 University of Donostia-Service of Neurology Hospital, San Sebastian, Spain  
39 University of Barcelona-Hospital Clinic of Barcelona, Barcelona, Spain  
40 Norwegian University of Science and Technology, Trondheim, Norway  
41 Tel Aviv Sourasky Medical Center, Tel Aviv, Israel  
42 Foundation for Biomedical research of the Academy of Athens, Athens, Greece  
43 Pfizer, Inc., Groton, CT  
44 Biogen Idec, Cambridge, MA  
45 GE Healthcare, Princeton, NJ  
46 AbbVie, Abbot Park, IL

47 Bristol-Myers Squibb Company  
48 F.Hoffmann La-Roche, Basel, Switzerland  
49 Merck & Co., North Wales, PA  
50 Genentech, Inc., South San Francisco, CA  
51 GlaxoSmithKline, Stevenage, United Kingdom  
52 Covance, Dedham, MA  
53 H. Lundbeck A/S  
54 Avid Radiopharmaceuticals, Philadelphia , PA  
55 UCB Pharma S.A., Brussels, Belgium  
56 Meso Scale Discovery  
57 Piramal Life Sciences, Berlin, Germany

**Supplementary Table S1. Selected single nucleotide variants typed by NeuroX**

| Variant Name | NeuroX_ID                        | Other Name            | Data Dictionary Entry                                     |
|--------------|----------------------------------|-----------------------|-----------------------------------------------------------|
| rs114138760  | NeuroX_dbSNP_rs114138760         |                       | rs114138760 C/G (FWD) G:Ancestral C:Minor                 |
| rs76763715   | exm106217                        | GBA p.N370S           | rs76763715 C/T (FWD) T:Ancestral C:Minor                  |
| rs71628662   | NeuroX_rs71628662                |                       | rs71628662 C/T (FWD) T:Ancestral C:Minor                  |
| rs823118     | NeuroX_rs823118                  |                       | rs823118 C/T (FWD) C:Ancestral T:Minor                    |
| rs10797576   | NeuroX_rs10797576                |                       | rs10797576 C/T (FWD) C:Ancestral T:Minor                  |
| rs6430538    | NeuroX_rs6430538                 |                       | rs6430538 C/T (FWD) T:Ancestral C:Minor                   |
| rs1955337    | NeuroX_rs1955337                 |                       | rs1955337 G/T (FWD) G:Ancestral T:Minor                   |
| rs12637471   | NeuroX_rs12637471                |                       | rs12637471 A/G (FWD) G:Ancestral A:Minor                  |
| rs34884217   | NeuroX_rs34884217                |                       | rs34884217 (G/T) REV T:Ancestral C:Minor                  |
| rs34311866   | NeuroX_rs34311866                |                       | rs34311866 A/G (REV) A:Ancestral C:Minor                  |
| rs11724635   | NeuroX_rs11724635                |                       | rs11724635 A/C (FWD) A:Ancestral A:Minor                  |
| rs6812193    | exm-rs6812193                    |                       | rs6812193 C/T (FWD) C:Ancestral T:Minor                   |
| rs356181     | NeuroX_rs356181                  |                       | rs356181 C/T (REV) T:Ancestral A:Minor                    |
| rs3910105    | NeuroX_rs3910105                 |                       | rs3910105 C/T (REV) T:Ancestral G:Minor                   |
| rs8192591    | exm535099                        |                       | rs8192591 A/G (REV) G:Ancestral T:Minor                   |
| rs115462410  | NeuroX_dbSNP_rs115462410         |                       | rs9275326 (was rs115462410) C/T (FWD) C:Ancestral T:Minor |
| rs199347     | NeuroX_rs199347                  |                       | rs199347 C/T (REV) C:Ancestral G:Minor                    |
| rs591323     | NeuroX_rs591323                  |                       | rs591323 A/G (FWD) G:Ancestral A:Minor                    |
| rs118117788  | NeuroX_dbSNP_rs118117788         |                       | rs118117788 C/T (FWD) C:Ancestral T:Minor                 |
| rs329648     | NeuroX_rs329648                  |                       | rs329648 C/T (FWD) T:Ancestral T:Minor                    |
| rs76904798   | NeuroX_rs76904798                |                       | rs76904798 C/T (FWD) T:Ancestral T:Minor                  |
| rs34995376   | NeuroX_rs34995376                | <i>LRRK2</i> p.R1441H | rs34995376 A/G (FWD) G:Ancestral A:Minor                  |
| rs35801418   | NeuroX_rs35801418                | <i>LRRK2</i> p.Y1699C | rs35801418 A/G (FWD) A:Ancestral G:Minor                  |
| rs34637584   | exm994671                        | <i>LRRK2</i> p.G2019S | rs34637584 A/G (FWD) G:Ancestral A:Minor                  |
| rs35870237   | NeuroX_rs35870237                | <i>LRRK2</i> p.I2020T | rs35870237 C/T (FWD) T:Ancestral C:Minor                  |
| rs11060180   | NeuroX_rs11060180                |                       | rs11060180 A/G (FWD) A:Ancestral G:Minor                  |
| rs11158026   | NeuroX_rs11158026                |                       | rs11158026 C/T (FWD) T:Ancestral T:Minor                  |
| rs2414739    | NeuroX_rs2414739                 |                       | rs2414739 A/G (FWD) G:Ancestral G:Minor                   |
| rs14235      | NeuroX_dbSNP_rs14235_replicate_1 |                       | rs14235 A/G (FWD) G:Ancestral A:Minor                     |
| rs11868035   | exm-rs11868035                   |                       | rs11868035 A/G (FWD) G:Ancestral A:Minor                  |
| rs17649553   | NeuroX_rs17649553                |                       | rs17649553 C/T (FWD) T:Ancestral T:Minor                  |
| rs12456492   | NeuroX_rs12456492                |                       | rs12456492 A/G (FWD) G:Ancestral G:Minor                  |
| rs55785911   | NeuroX_rs55785911                |                       | rs55785911 A/G (FWD) G:Ancestral A:Minor                  |

**Supplementary Table S2: Single variant associations from logistic regression for either PD, SWEDD or PD+SWEDD compared to all available controls.** Abbreviations include OR for odds ratio, MAF for minor allele frequency, SE for standard error and P for p-value using the same stepwise models as for the GRS-based analyses.

| SNP Information    |   |               |                     |                  | PD     |        |        |        |        | SWEDD  |        |        |        |        | PD + SWEDD |        |        |        |        |
|--------------------|---|---------------|---------------------|------------------|--------|--------|--------|--------|--------|--------|--------|--------|--------|--------|------------|--------|--------|--------|--------|
| rsID               | C | Position (BP) | Effect/minor allele | Ref/major allele | OR     | MAF    | BETA   | SE     | P      | OR     | MAF    | BETA   | SE     | P      | OR         | MAF    | BETA   | SE     | P      |
| <i>rs114138760</i> | 1 | 154898185     | C                   | G                | 1.2151 | 0.0132 | 0.1949 | 0.7091 | 0.7835 | 1.1818 | 0.0132 | 0.1670 | 1.0629 | 0.8751 | 1.3367     | 0.0132 | 0.2902 | 0.6920 | 0.6750 |
| <i>rs76763715</i>  | 1 | 155359992     | C                   | T                | 7.6228 | 0.0075 | 2.0311 | 1.1358 | 0.0737 | 1.5804 | 0.0075 | 0.4577 | 1.5392 | 0.7662 | 6.1594     | 0.0075 | 1.8180 | 1.1166 | 0.1035 |
| <i>rs71628662</i>  | 1 | 155359992     | C                   | T                | 2.0324 | 0.0169 | 0.7092 | 0.6680 | 0.2884 | 0.0000 | 0.0169 | -14.37 | 820    | 0.9860 | 2.0213     | 0.0169 | 0.7037 | 0.6678 | 0.2920 |
| <i>rs823118</i>    | 1 | 205723572     | C                   | T                | 0.9678 | 0.4211 | -0.033 | 0.1476 | 0.8244 | 0.7205 | 0.4211 | -0.328 | 0.2526 | 0.1944 | 0.9550     | 0.4211 | -0.046 | 0.1406 | 0.7436 |
| <i>rs10797576</i>  | 1 | 232664611     | T                   | C                | 1.3077 | 0.1485 | 0.2683 | 0.2081 | 0.1974 | 1.9789 | 0.1485 | 0.6825 | 0.3214 | 0.0337 | 1.4175     | 0.1485 | 0.3489 | 0.2036 | 0.0866 |
| <i>rs6430538</i>   | 2 | 135539967     | T                   | C                | 0.9434 | 0.4596 | -0.058 | 0.1419 | 0.6813 | 0.7281 | 0.4596 | -0.317 | 0.2407 | 0.1873 | 0.9294     | 0.4596 | -0.073 | 0.1352 | 0.5885 |
| <i>rs1955337</i>   | 2 | 169129145     | T                   | G                | 0.9284 | 0.1485 | -0.075 | 0.1997 | 0.7100 | 0.9178 | 0.1485 | -0.086 | 0.3198 | 0.7885 | 0.8676     | 0.1485 | -0.142 | 0.1924 | 0.4606 |
| <i>rs12637471</i>  | 3 | 182762437     | A                   | G                | 0.6788 | 0.1955 | -0.388 | 0.1858 | 0.0370 | 0.7325 | 0.1955 | -0.311 | 0.3165 | 0.3254 | 0.7453     | 0.1955 | -0.294 | 0.1791 | 0.1007 |
| <i>rs34884217</i>  | 4 | 944210        | G                   | T                | 0.7673 | 0.0987 | -0.265 | 0.2246 | 0.2382 | 0.3793 | 0.0987 | -0.970 | 0.5030 | 0.0539 | 0.7224     | 0.0987 | -0.325 | 0.2195 | 0.1385 |
| <i>rs34311866</i>  | 4 | 951947        | G                   | A                | 1.5334 | 0.2218 | 0.4275 | 0.1822 | 0.0189 | 2.3743 | 0.2218 | 0.8647 | 0.3049 | 0.0046 | 1.6117     | 0.2218 | 0.4773 | 0.1763 | 0.0068 |
| <i>rs11724635</i>  | 4 | 15737101      | C                   | A                | 0.6708 | 0.4417 | -0.400 | 0.1443 | 0.0057 | 0.8501 | 0.4417 | -0.162 | 0.2467 | 0.5102 | 0.6953     | 0.4417 | -0.363 | 0.1389 | 0.0089 |
| <i>rs6812193</i>   | 4 | 77198986      | T                   | C                | 1.0764 | 0.3637 | 0.0736 | 0.1510 | 0.6260 | 1.0647 | 0.3637 | 0.0627 | 0.2769 | 0.8208 | 1.0296     | 0.3637 | 0.0292 | 0.1448 | 0.8402 |
| <i>rs356181</i>    | 4 | 90626139      | T                   | C                | 1.6947 | 0.5009 | 0.5275 | 0.1460 | 0.0003 | 0.9371 | 0.5009 | -0.065 | 0.2619 | 0.8042 | 1.5164     | 0.5009 | 0.4163 | 0.1382 | 0.0026 |
| <i>rs3910105</i>   | 4 | 90682571      | C                   | T                | 0.7083 | 0.4455 | -0.345 | 0.1408 | 0.0143 | 1.0973 | 0.4455 | 0.0928 | 0.2357 | 0.6936 | 0.7618     | 0.4455 | -0.272 | 0.1355 | 0.0447 |
| <i>rs8192591</i>   | 6 | 32185796      | T                   | C                | 1.1950 | 0.0320 | 0.1781 | 0.4385 | 0.6846 | 2.4290 | 0.0320 | 0.8875 | 0.6123 | 0.1472 | 1.4724     | 0.0320 | 0.3869 | 0.4207 | 0.3578 |

**Supplementary Table S2 (continued): Single variant associations from logistic regression for either PD, SWEDD or PD+SWEDD compared to all available controls.** Abbreviations include OR for odds ratio, MAF for minor allele frequency, SE for standard error and P for p-value using the same stepwise models as for the GRS-based analyses.

| SNP Information    |    |               |                     |                  | PD     |        |        |        |        | SWEDD  |        |        |        |        | PD + SWEDD |        |        |        |        |
|--------------------|----|---------------|---------------------|------------------|--------|--------|--------|--------|--------|--------|--------|--------|--------|--------|------------|--------|--------|--------|--------|
| rsID               | C  | Position (BP) | Effect/minor allele | Ref/major allele | OR     | MAF    | BETA   | SE     | P      | OR     | MAF    | BETA   | SE     | P      | OR         | MAF    | BETA   | SE     | P      |
| <i>rs115462410</i> | 6  | 32666660      | T                   | C                | 0.5625 | 0.0827 | -0.575 | 0.2435 | 0.0181 | 1.0677 | 0.0827 | 0.0655 | 0.3612 | 0.8560 | 0.5883     | 0.0827 | -0.531 | 0.2274 | 0.0197 |
| <i>rs199347</i>    | 7  | 23293746      | C                   | T                | 1.0520 | 0.3910 | 0.0507 | 0.1495 | 0.7344 | 1.0783 | 0.3910 | 0.0753 | 0.2576 | 0.7699 | 1.0092     | 0.3910 | 0.0091 | 0.1437 | 0.9494 |
| <i>rs591323</i>    | 8  | 16697091      | A                   | G                | 0.8528 | 0.2637 | -0.159 | 0.1568 | 0.3098 | 1.2200 | 0.2637 | 0.1988 | 0.2508 | 0.4278 | 0.8907     | 0.2637 | -0.116 | 0.1481 | 0.4345 |
| <i>rs118117788</i> | 10 | 121710488     | T                   | C                | 1.3412 | 0.0254 | 0.2936 | 0.4780 | 0.5391 | 0.0000 | 0.0254 | -15.26 | 896    | 0.9864 | 1.2532     | 0.0254 | 0.2257 | 0.4712 | 0.6319 |
| <i>rs329648</i>    | 11 | 133765367     | T                   | C                | 1.1006 | 0.3656 | 0.0959 | 0.1438 | 0.5049 | 0.8699 | 0.3656 | -0.139 | 0.2574 | 0.5881 | 1.0650     | 0.3656 | 0.0630 | 0.1379 | 0.6478 |
| <i>rs76904798</i>  | 12 | 40614434      | T                   | C                | 1.6953 | 0.1353 | 0.5279 | 0.2355 | 0.0250 | 2.3340 | 0.1353 | 0.8476 | 0.3527 | 0.0163 | 1.7264     | 0.1353 | 0.5461 | 0.2269 | 0.0161 |
| <i>rs34637584</i>  | 12 | 40734202      | A                   | G                | 1.3E6  | 0.0047 | 14.105 | 580    | 0.9806 | NA     | NA     | NA     | NA     | NA     | 1.3E6      | 0.0047 | 14.086 | 597    | 0.9812 |
| <i>rs11060180</i>  | 12 | 123303586     | G                   | A                | 1.0295 | 0.4445 | 0.0291 | 0.1370 | 0.8317 | 1.0229 | 0.0047 | 0.0226 | 0.2328 | 0.9226 | 0.9946     | 0.4445 | -0.005 | 0.1325 | 0.9674 |
| <i>rs11158026</i>  | 14 | 55348869      | T                   | C                | 0.8598 | 0.3299 | -0.151 | 0.1527 | 0.3225 | 0.9536 | 0.4445 | -0.048 | 0.2780 | 0.8643 | 0.9210     | 0.3299 | -0.082 | 0.1480 | 0.5780 |
| <i>rs2414739</i>   | 15 | 61994134      | G                   | A                | 0.8445 | 0.2528 | -0.169 | 0.1580 | 0.2848 | 0.6250 | 0.3299 | -0.470 | 0.2819 | 0.0955 | 0.8128     | 0.2528 | -0.207 | 0.1523 | 0.1738 |
| <i>rs14235</i>     | 16 | 31121793      | A                   | G                | 1.2289 | 0.3891 | 0.2061 | 0.1533 | 0.1788 | 1.3086 | 0.2528 | 0.2689 | 0.2498 | 0.2816 | 1.1839     | 0.3891 | 0.1688 | 0.1458 | 0.2471 |
| <i>rs11868035</i>  | 17 | 17715101      | A                   | G                | 1.0247 | 0.3017 | 0.0244 | 0.1516 | 0.8721 | 1.3911 | 0.3891 | 0.3301 | 0.2510 | 0.1885 | 1.0900     | 0.3017 | 0.0862 | 0.1469 | 0.5574 |
| <i>rs17649553</i>  | 17 | 43994648      | T                   | C                | 1.0805 | 0.2143 | 0.0775 | 0.1710 | 0.6506 | 1.2443 | 0.3017 | 0.2186 | 0.2850 | 0.4432 | 1.0699     | 0.2143 | 0.0675 | 0.1633 | 0.6792 |
| <i>rs12456492</i>  | 18 | 40673380      | G                   | A                | 0.9891 | 0.3130 | -0.011 | 0.1500 | 0.9418 | 1.0220 | 0.2143 | 0.0217 | 0.2693 | 0.9356 | 1.0076     | 0.3130 | 0.0075 | 0.1459 | 0.9588 |
| <i>rs55785911</i>  | 20 | 3153503       | A                   | G                | 1.2420 | 0.3647 | 0.2167 | 0.1505 | 0.1499 | 0.9448 | 0.3130 | -0.057 | 0.2504 | 0.8206 | 1.1993     | 0.3647 | 0.1817 | 0.1460 | 0.2132 |
