# Supplementary material
Source: PubMed Central journal article supplement (PMC4724309)

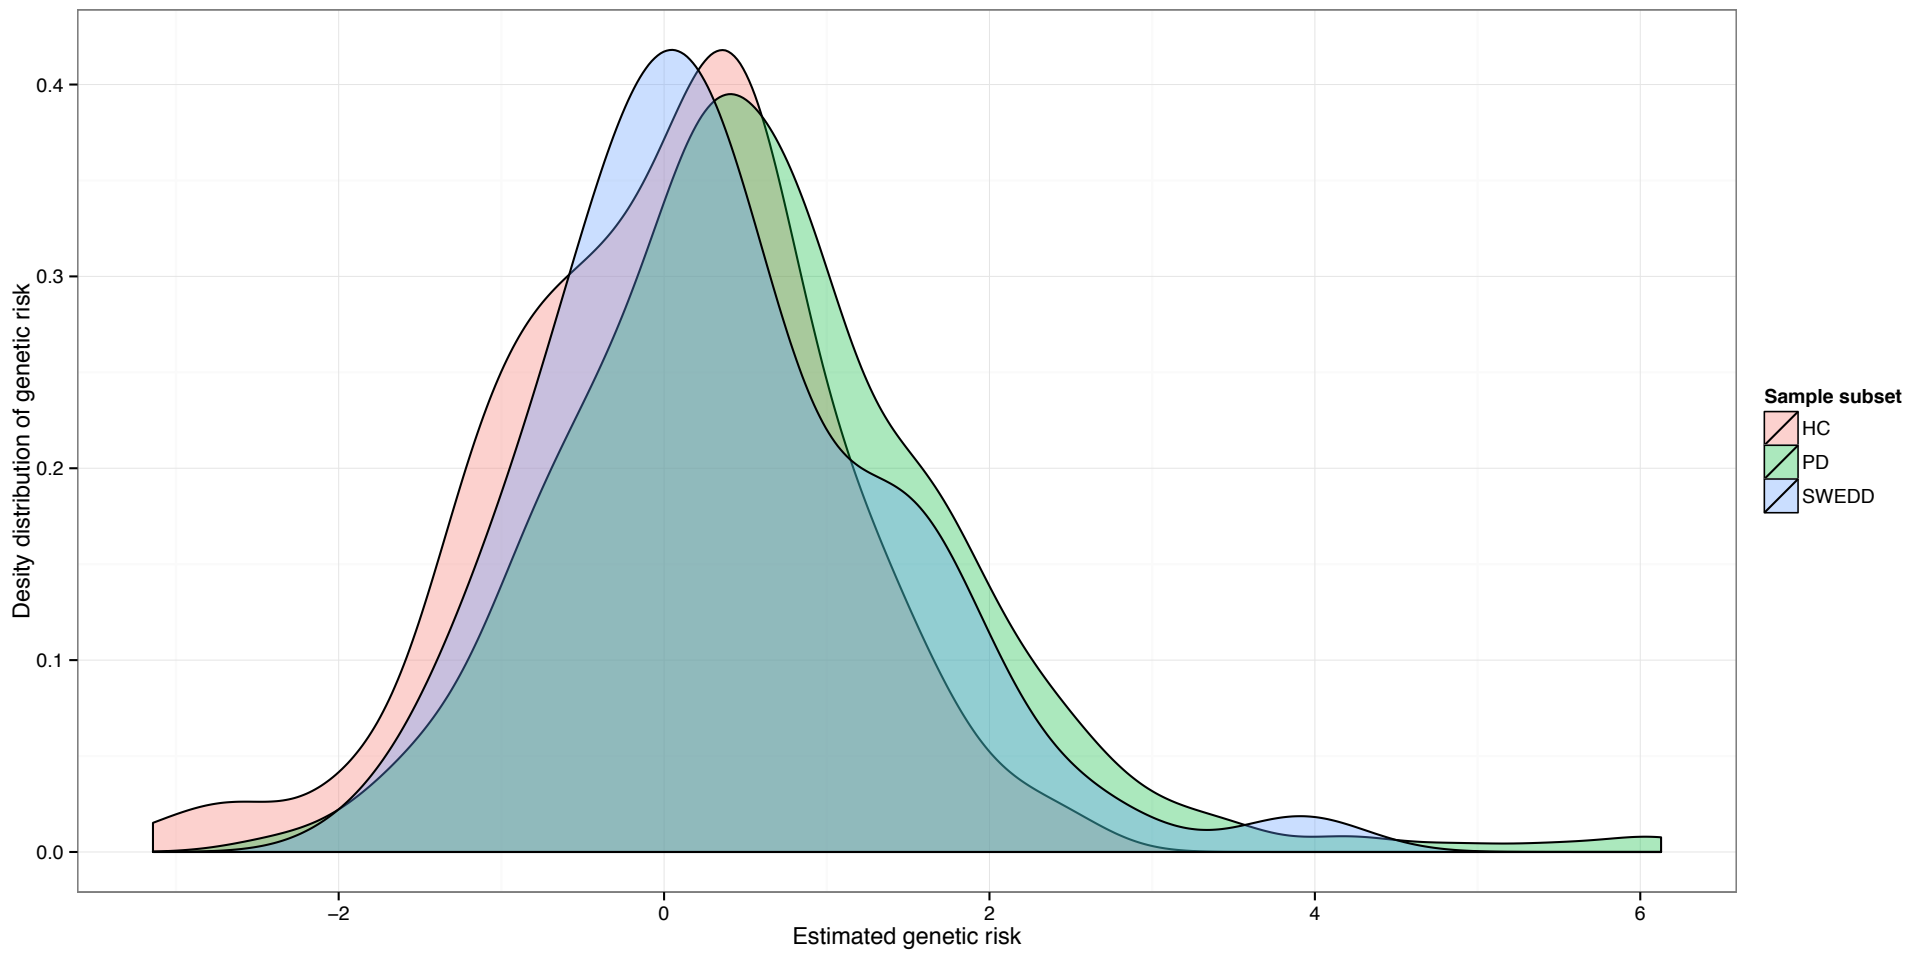

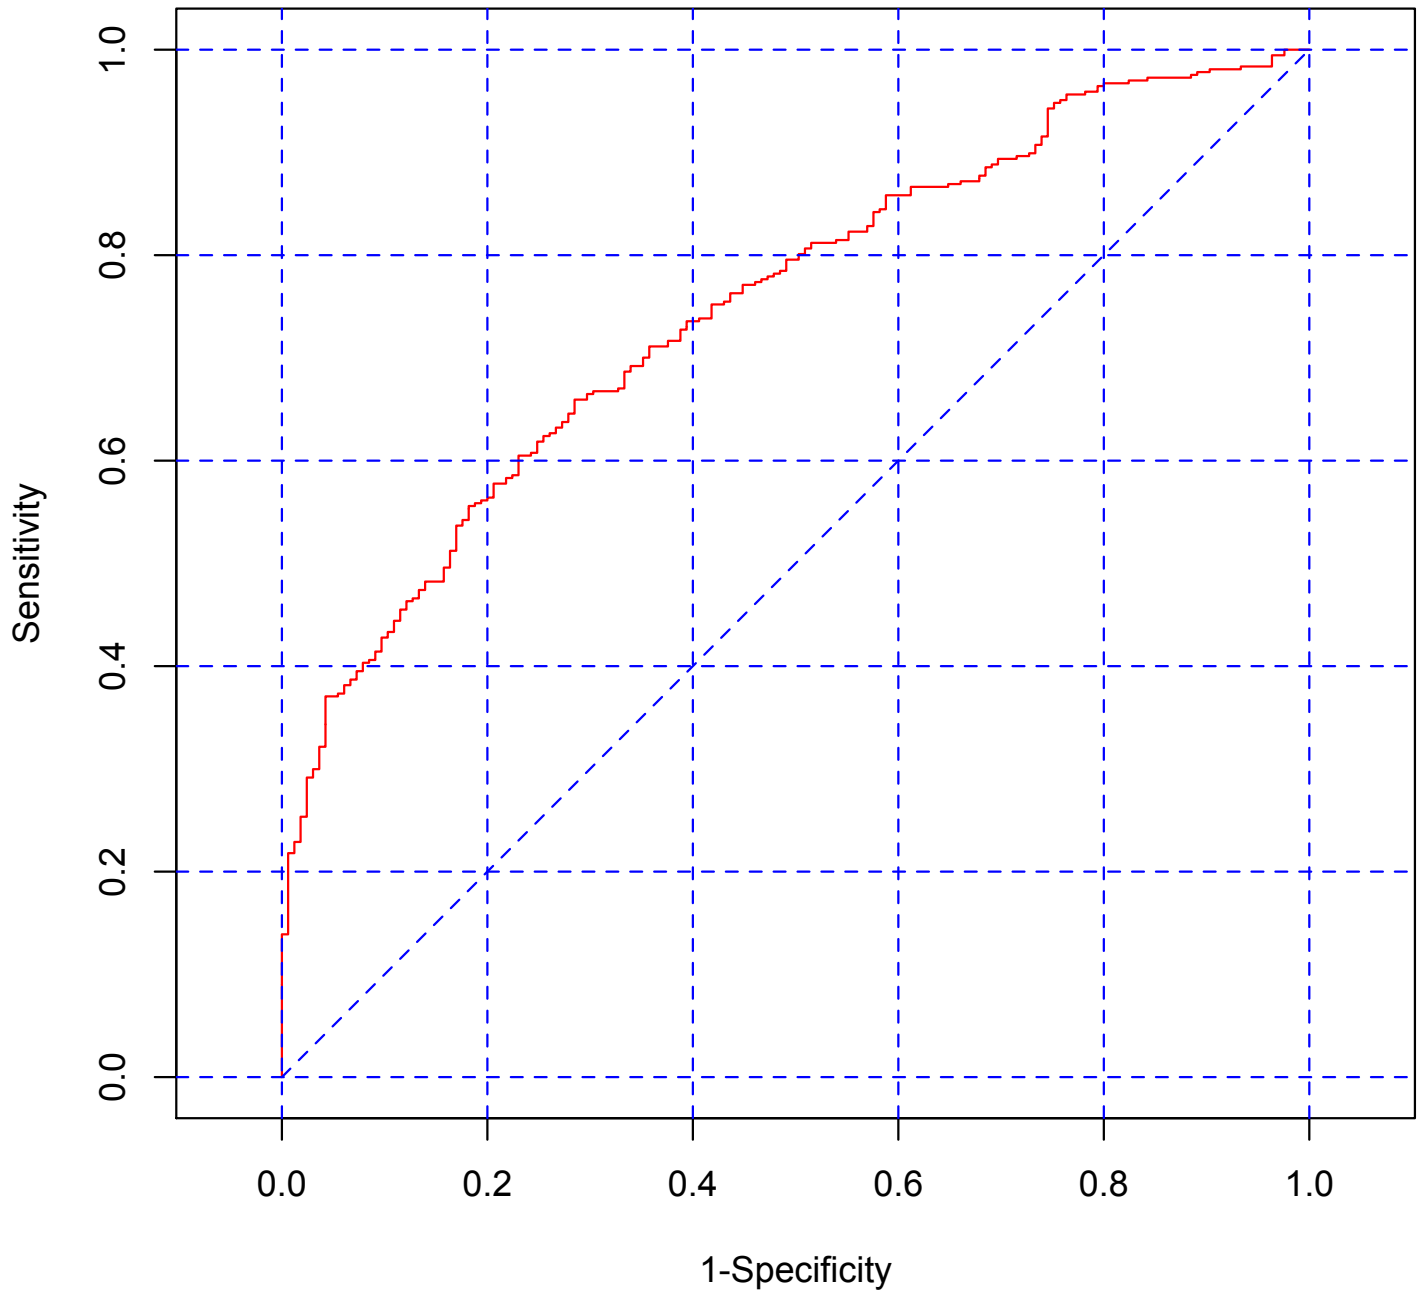

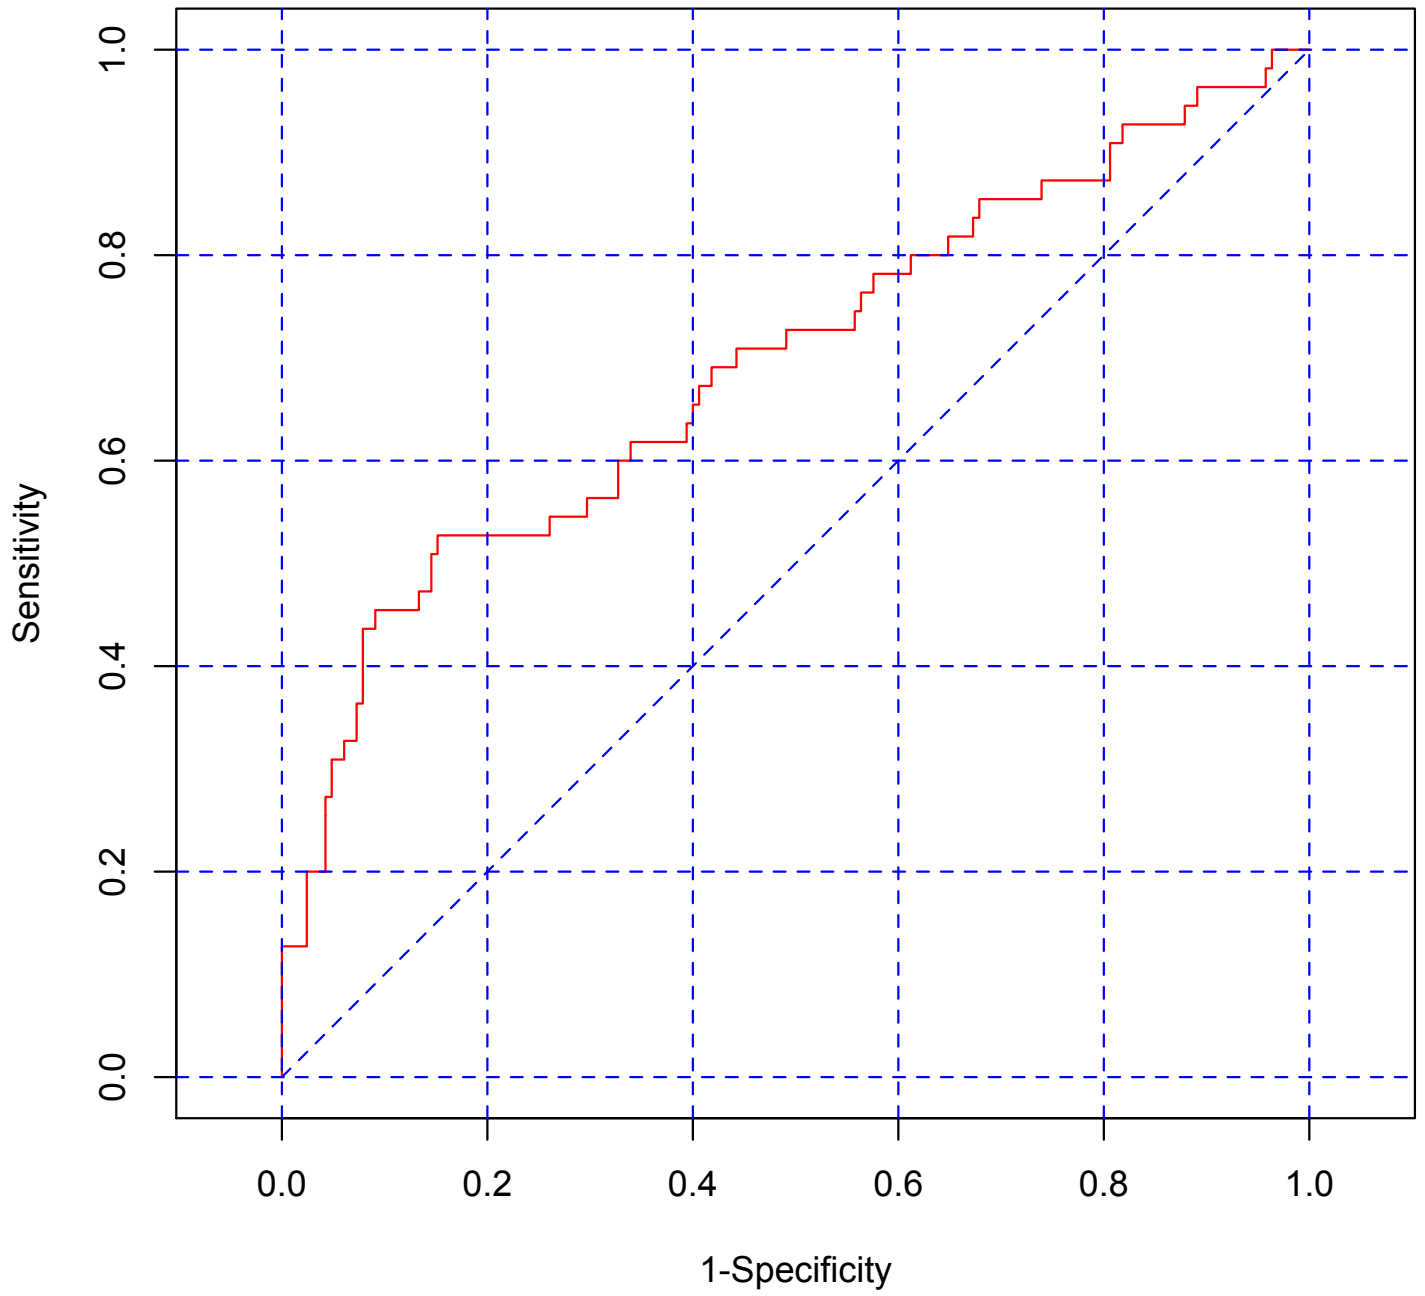

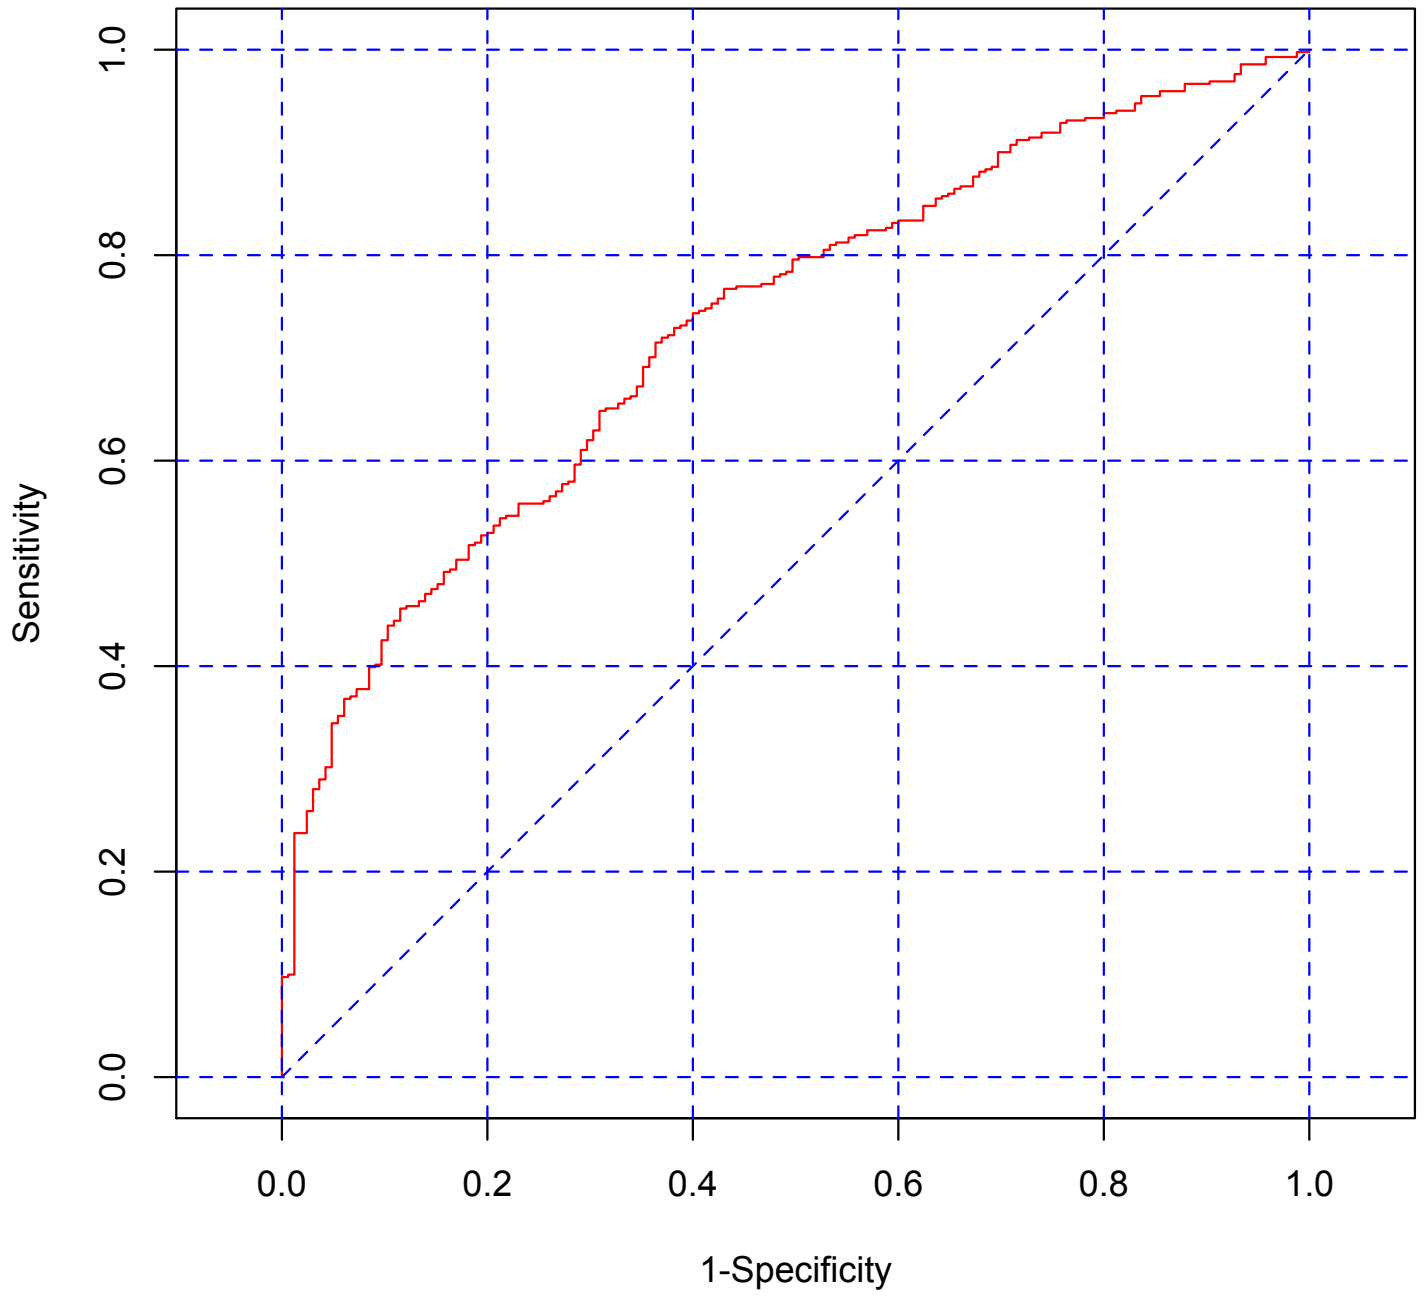

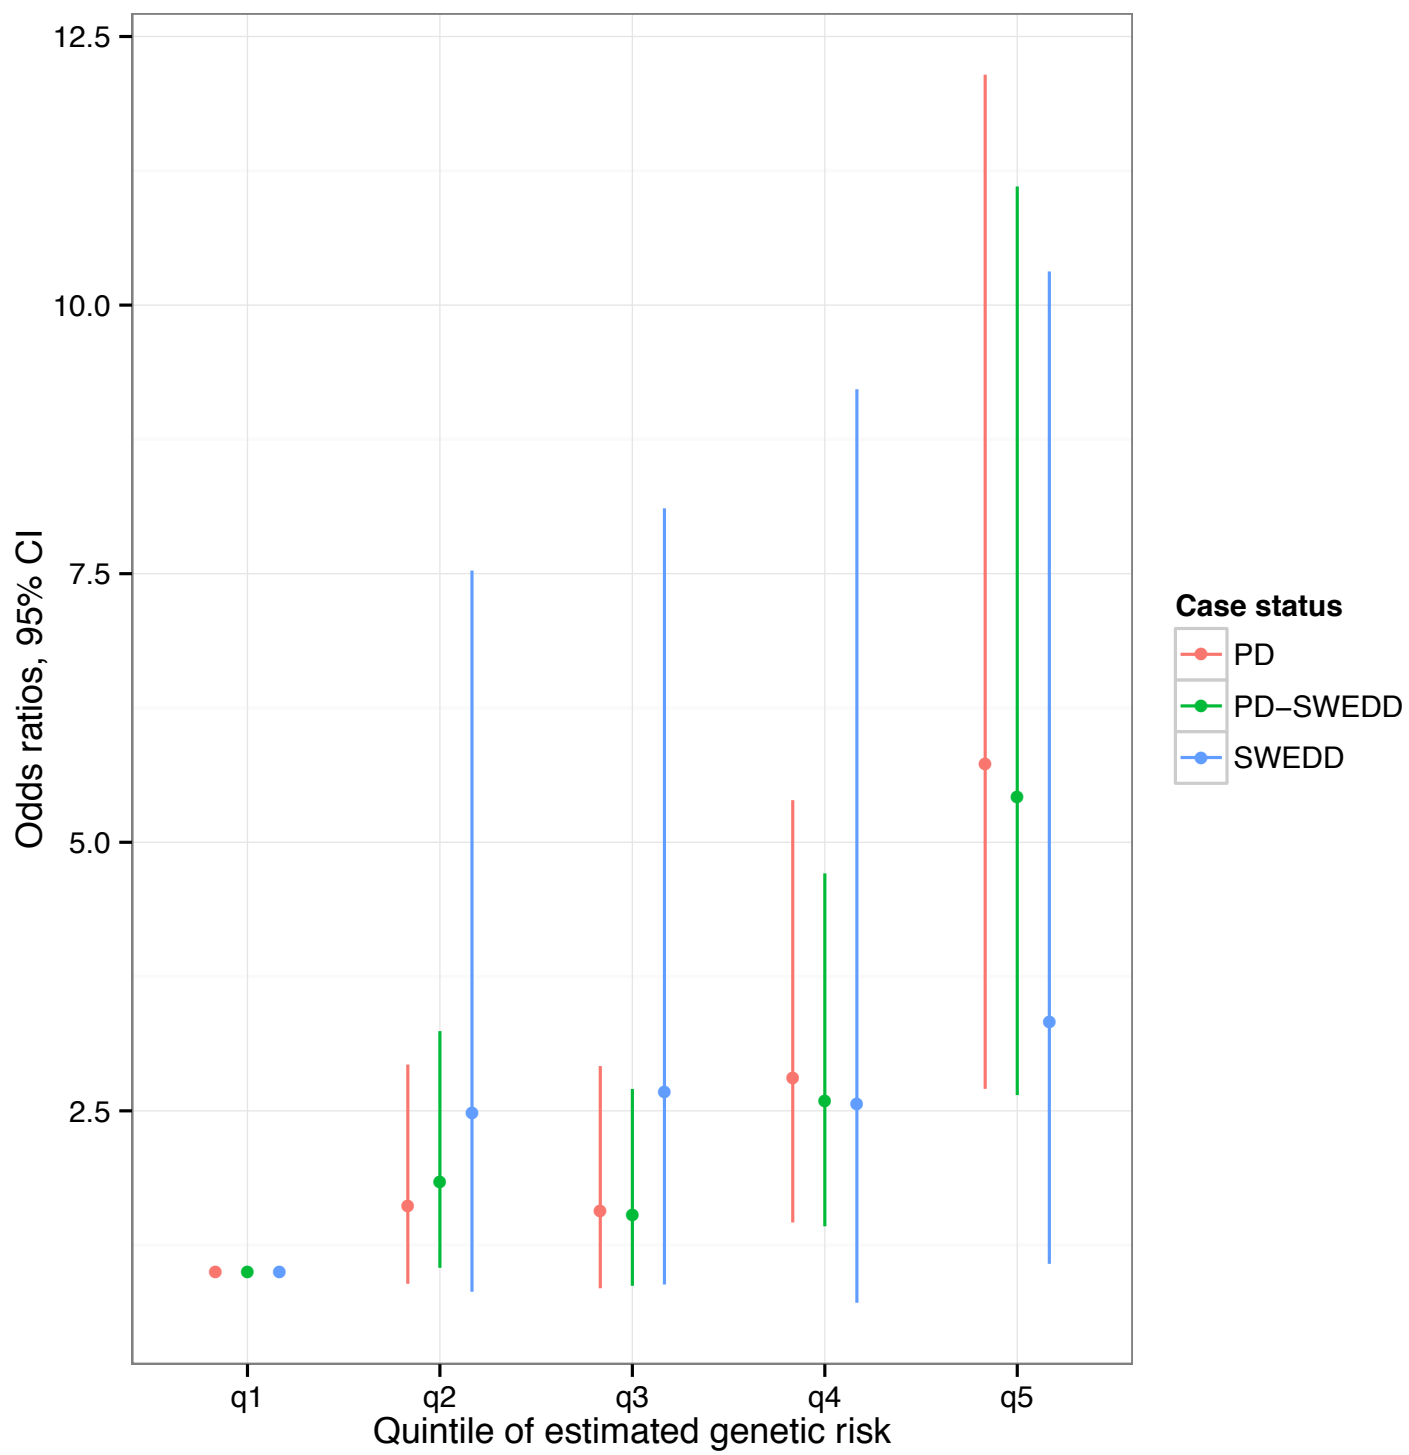

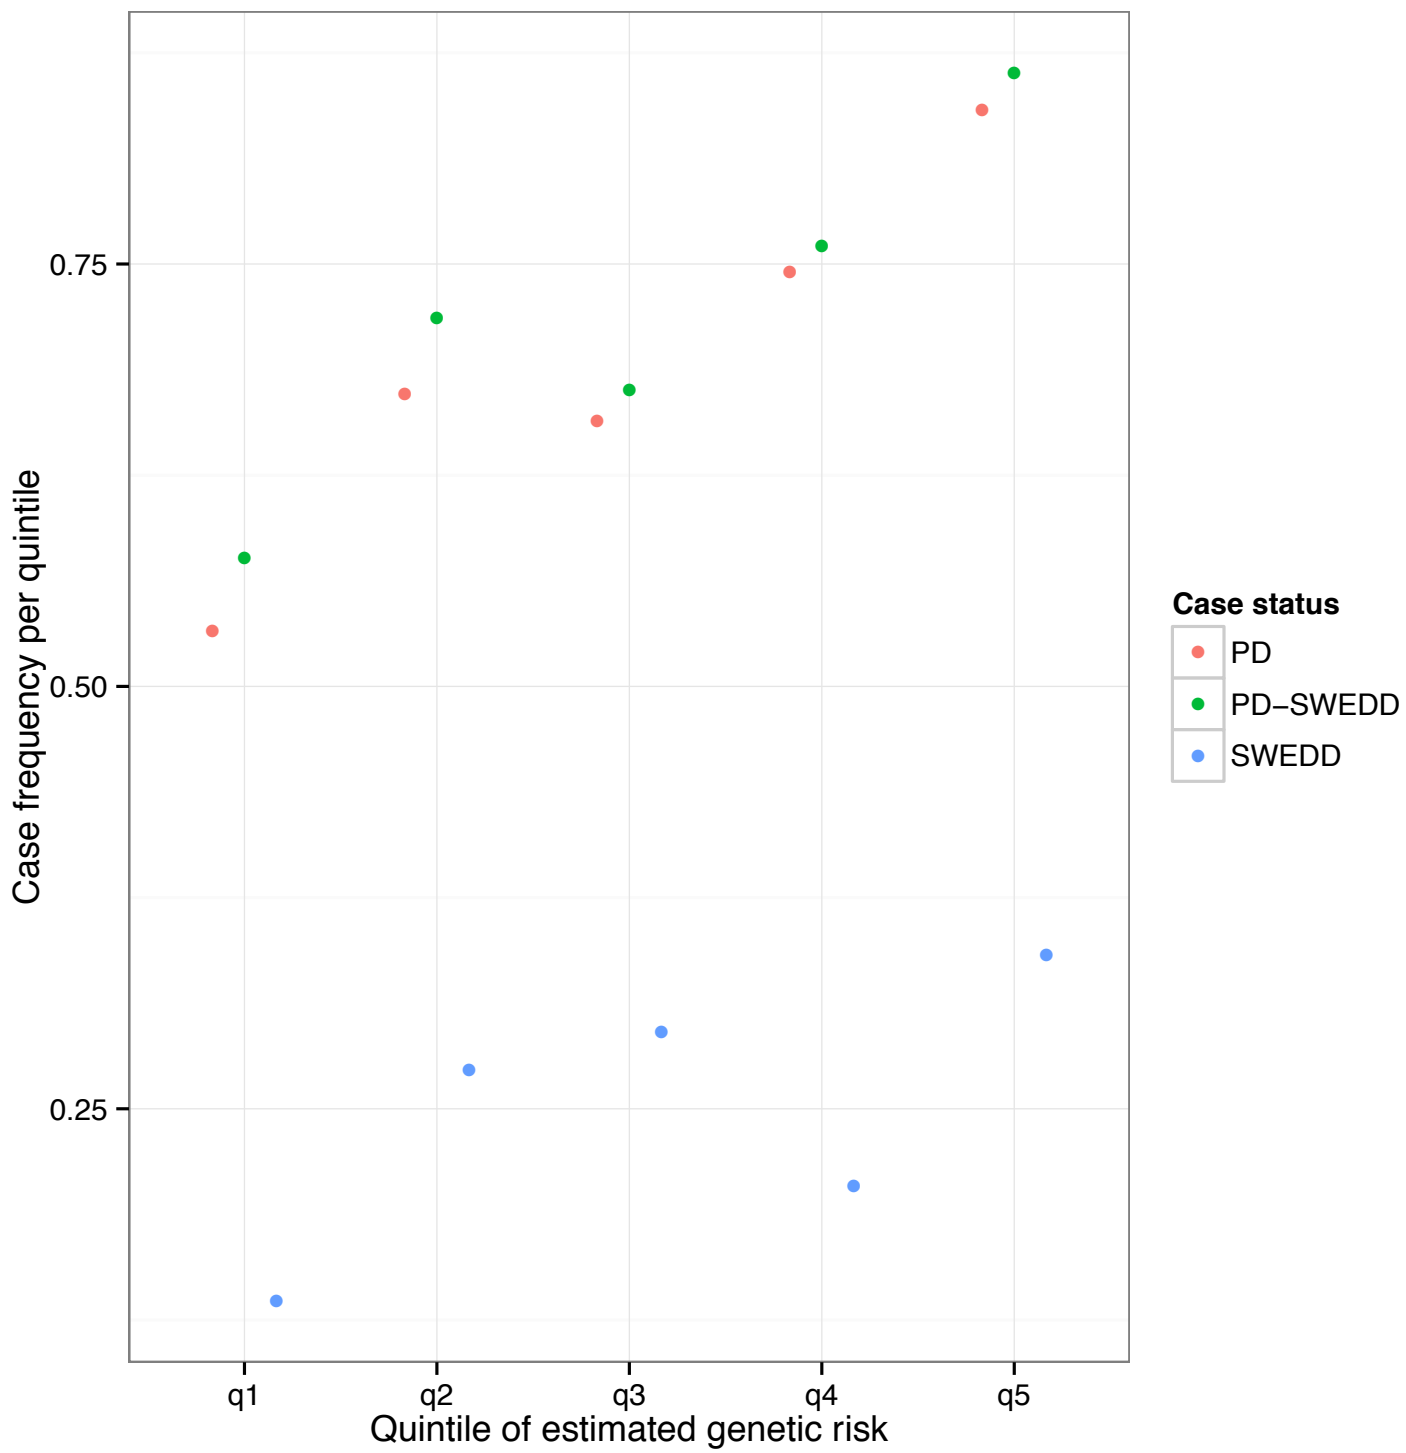

Supplement: NIHMS710772-supplement-Supp_Figures.pdf [file NIHMS710772-supplement-Supp_Figures.pdf]
